# Supplementary material for: Incidence and Predictors of Intracardiac Thrombus on Pre-electrophysiological Procedure Transesophageal Echocardiography
Source: PubMed Central journal article supplement — CJC Open. 2019 Jul 2;1(5):231–7. doi: 10.1016/j.cjco.2019.06.004 (PMC7063624; doi:10.1016/j.cjco.2019.06.004), 2019-07-02
Supplement: mmc1.pdf [file mmc1.pdf]

**SUPPLEMENTARY MATERIAL**

**Supplemental Table S1.**

| <b>Baseline characteristics</b>                                 | <b>All Patients<br/>(N=393)<br/>N (%)</b> | <b>AF ablation<br/>patients<br/>(N=174)</b> | <b>Aflutter<br/>Ablation<br/>(N=146)</b> | <b>Cardioversion<br/>(N=73)</b> | <b>P-value</b> |
|-----------------------------------------------------------------|-------------------------------------------|---------------------------------------------|------------------------------------------|---------------------------------|----------------|
| Mean age, years ( $\pm$ SD)                                     | 65 (56-72)                                | 63 (53-69)                                  | 69 (62-76)                               | 65.5 (57-71)                    | 0.0009         |
| <65                                                             | 183 (46.5)                                | 100 (57.5)                                  | 47 (32.2)                                | 36 (48.7)                       | <0.001         |
| 65-75                                                           | 138 (35.0)                                | 56 (32.2)                                   | 55 (37.7)                                | 37 (36.5)                       | 0.57           |
| $\geq$ 75                                                       | 73 (18.5)                                 | 18 (10.3)                                   | 44 (30.1)                                | 11 (14.9)                       | <0.001         |
| Female                                                          | 103 (26.1)                                | 46 (26.4)                                   | 36 (24.7)                                | 21 (28.4)                       | 0.83           |
| Hypertension [N=382]                                            | 172 (45.6)                                | 66 (39.3)                                   | 73 (52.9)                                | 33 (46.5)                       | 0.06           |
| Diabetes [N=381]                                                | 85 (22.6)                                 | 29 (17.3)                                   | 34 (24.6)                                | 22 (31.4)                       | 0.05           |
| Cerebrovascular accident / transient<br>ischemic attack [N=380] | 34 (9.1)                                  | 16 (9.6)                                    | 7 (5.1)                                  | 11 (15.7)                       | 0.04           |
| Heart Failure [N=381]                                           | 131 (34.8)                                | 43 (25.6)                                   | 50 (36.2)                                | 38 (54.3)                       | <0.001         |
| Vascular Disease [N=380]                                        | 89 (23.7)                                 | 32 (19.1)                                   | 41 (29.7)                                | 16 (22.9)                       | 0.09           |
| Valvular Disease                                                | 59 (20.3)                                 | 20 (14.8)                                   | 24 (25.3)                                | 15 (25.0)                       | 0.09           |
| CHADS <sub>2</sub>                                              | 1 (0-2)                                   | 1 (0-2)                                     | 1 (0-2)                                  | 2 (1-3)                         | 0.70           |
| CHA <sub>2</sub> DS <sub>2</sub> -VASc score                    | 2 (1-3)                                   | 2 (0-3)                                     | 2.5 (1-4)                                | 2.5 (1-4)                       | 0.78           |
| 0                                                               | 61 (15.5)                                 | 45 (25.9)                                   | 11 (7.5)                                 | 5 (6.8)                         | <0.001         |
| 1                                                               | 87 (22.1)                                 | 38 (21.8)                                   | 31 (21.2)                                | 18 (24.3)                       | 0.87           |
| 2                                                               | 76 (19.3)                                 | 31 (17.8)                                   | 31 (21.2)                                | 14 (18.9)                       | 0.74           |
| 3                                                               | 72 (18.3)                                 | 32 (18.4)                                   | 25 (17.1)                                | 15 (20.3)                       | 0.85           |
| $\geq$ 4                                                        | 97 (24.7)                                 | 28 (16.1)                                   | 48 (32.9)                                | 22 (29.7)                       | 0.001          |
| Left ventricular ejection fraction<br>(N=295)                   | 58 (43-60)                                | 60 (50-63)                                  | 56.5 (35-60)                             | 55 (38-60)                      | 0.67           |
| Labs                                                            |                                           |                                             |                                          |                                 |                |
| Hemoglobin (N=320)                                              | 136 (124-147)                             | 139 (130-151)                               | 132 (118-142)                            | 134 (124-145)                   | 0.06           |
| Creatinine (N=328)                                              | 86 (73-99.5)                              | 84 (72-96)                                  | 91 (72-116)                              | 86 (78-100)                     | 0.18           |
| International normalized<br>ratio (INR) (N=110)*                | 1.2 (1.1-1.8)                             | 1.1 (1.0-1.4)                               | 1.1 (1.1-2.0)                            | 1.3 (1.1-2.4)                   | 0.20           |

|                                |            |            |           |           |      |
|--------------------------------|------------|------------|-----------|-----------|------|
| Anticoagulation/ Antiplatelets |            |            |           |           |      |
| Warfarin                       | 109 (27.7) | 39 (22.4)  | 45 (30.8) | 25 (33.8) | 0.11 |
| Direct oral anticoagulants     | 233 (61.4) | 107 (64.1) | 84 (59.6) | 42 (60.0) | 0.69 |
| Apixaban                       | 85 (21.6)  | 38 (21.8)  | 30 (20.6) | 17 (23.0) | 0.91 |
| Low Dose                       | 2 (0.5)    | 1 (0.6)    | 1 (0.7)   | 0 (0.0)   | 0.79 |
| High Dose                      | 83 (21.1)  | 37 (21.3)  | 29 (19.9) | 17 (23.0) | 0.86 |
| Dabigatran                     | 58 (15.3)  | 31 (18.6)  | 19 (13.5) | 8 (11.4)  | 0.28 |
| Low Dose                       | 8 (2.0)    | 3 (1.7)    | 4 (2.7)   | 1 (1.4)   | 0.73 |
| High Dose                      | 50 (13.2)  | 28 (16.8)  | 15 (10.6) | 7 (10.0)  | 0.19 |
| Rivaroxaban                    | 90 (22.8)  | 38 (21.8)  | 35 (24.0) | 17 (23.0) | 0.90 |
| Low Dose                       | 4 (1.0)    | 0 (0.0)    | 4 (2.7)   | 0 (0.0)   | 0.03 |
| High Dose                      | 86 (21.8)  | 38 (21.8)  | 31 (21.3) | 17 (23.0) | 0.96 |
| Antiplatelet Agents            | 35 (9.3)   | 21 (12.6)  | 11 (7.8)  | 3 (4.3)   | 0.10 |
| None                           | 17 (4.3)   | 7 (4.0)    | 6 (4.1)   | 4 (5.4)   | 0.88 |
| LAA thrombus                   | 43 (10.9)  | 16 (9.2)   | 15 (10.3) | 12 (20.5) | 0.29 |

**Supplemental Table S2.** Univariate Analysis of predictors of LAA thrombus on TEE.

| Covariates                                | OR   | 95% CI     |
|-------------------------------------------|------|------------|
| Age                                       | 1.03 | 1.01-1.07  |
| Paroxysmal AF                             | 0.47 | 0.22-0.99  |
| Persistent AF                             | 2.33 | 1.14- 4.81 |
| Prior Cerebrovascular Accident            | 3.41 | 1.47-7.93  |
| Heart Failure                             | 3.59 | 1.86-6.95  |
| Valvular Disease                          | 6.41 | 3.09-13.29 |
| CHADS <sub>2</sub>                        | 1.55 | 1.23-1.95  |
| CHA <sub>2</sub> DS <sub>2</sub> -Vasc    | 1.35 | 1.14-1.60  |
| Left Atrial Diameter                      | 1.15 | 1.04-1.28  |
| Left Ventricular Ejection Fraction (LVEF) | 0.97 | 0.95-0.99  |
| International Normalized Ratio (INR)      | 1.94 | 1.32-2.84  |
| Warfarin                                  | 3.24 | 1.72-6.10  |
| Direct Oral Anticoagulation (DOAC)        | 0.30 | 0.15-0.58  |

\*Covariates displayed in table A2 were all statistically significant. Non-statistically significant covariates were not displayed in table A2.
